# Supplementary material
Source: publisher site journal article supplement (https://static.cambridge.org/content/id/urn:cambridge.org:id:article:S003382222000123X/resource/name/S003382222000123Xsupp003.oxcal)
Supplement: Supplementary file 1 [file S003382222000123Xsupp003.oxcal]

 Plot()
 {
  Sequence()
  {
   Boundary("OM.WU.076 Start 1");
   Phase("1")
   {
    R_Date("CRL19788", 2271, 28);
    R_Date("CRL19789", 2040, 25);
   };
   Boundary("OM.WU.076 End 1");
  };
  Difference("Gap OM.WU.076","CRL19789","CRL19788");
  Difference("Duration OM.WU.076","OM.WU.076 End 1","OM.WU.076 Start 1");
  Sequence()
  {
   Boundary("OM.WU.084 Start 1");
   Phase("1")
   {
    R_Date("CRL19793", 2281, 28);
    R_Date("CRL19790", 2108, 25);
   };
   Boundary("OM.WU.084 End 1");
  };
  Difference("Gap OM.WU.084","CRL19790","CRL19793");
  Difference("Duration OM.WU.084","OM.WU.084 End 1","OM.WU.084 Start 1");
  Phase()
  {
   Sequence()
   {
    Boundary("OM.WU.090 Start 1");
    Phase("1")
    {
     R_Date("CRL19003", 2034, 28);
    };
    Boundary("OM.WU.090 End 1");
   };
   Sequence()
   {
    Boundary("OM.WU.090 Start 2");
    Phase("2")
    {
     R_Date("CRL19098", 1969, 16);
     R_Date("CRL19280", 1974, 16);
    };
    Boundary("OM.WU.090 End 2");
   };
  };
  Difference("Gap OM.WU.090","OM.WU.090 End 1","OM.WU.090 Start 2");
  Difference("Duration OM.WU.090","OM.WU.090 End 2","OM.WU.090 Start 1");
  Sequence()
  {
   Boundary("OM.WU.093 Start 1");
   Phase("1")
   {
    R_Date("CRL19210", 2177, 17);
    R_Date("CRL19209", 1910, 29);
   };
   Boundary("OM.WU.093 End 1");
  };
  Difference("Gap OM.WU.093","CRL19209","CRL19210");
  Difference("Duration OM.WU.093","OM.WU.093 End 1","OM.WU.093 Start 1");
  Sequence()
  {
   Boundary("OM.ZU.115 Start 1");
   Phase("1")
   {
    R_Date("CRL19212", 1964, 16);
    R_Date("CRL19207", 1929, 16);
   };
   Boundary("OM.ZU.115 End 1");
  };
  Difference("Gap OM.ZU.115","CRL19207","CRL19212");
  Difference("Duration OM.ZU.115","OM.ZU.115 End 1","OM.ZU.115 Start 1");
  Sequence()
  {
   Boundary("OM.ZU.190 Start 1");
   Phase("1")
   {
    R_Date("CRL19926", 2036, 19);
    R_Date("CRL19925", 1904, 20);
   };
   Boundary("OM.ZU.190 End 1");
  };
  Difference("Gap OM.ZU.190","CRL19925","CRL19926");
  Difference("Duration OM.ZU.190","OM.ZU.190 End 1","OM.ZU.190 Start 1");
 };
